# Supplementary material
Source: MDPI journal article supplement (https://www.mdpi.com/2304-6732/10/10/1113)
Supplement: s1 [file s1]

# Supporting Information

**Table S1.** Full title and abbreviation.

| Full title                               | Abbreviation |
|------------------------------------------|--------------|
| Inorganic halide perovskite quantum dots | IPQDs        |
| Nanocrystals                             | NCs          |
| Photoluminescence quantum yield          | PLQY         |
| Photoluminescence                        | PL           |
| Fluorine                                 | F            |
| Bromide                                  | Br           |
| Boron                                    | B            |
| Tetraethyl orthosilicate                 | TEOS         |
| Light emitting diode                     | LED          |
| Liquid crystal display                   | LCD          |
| Metal halide perovskites                 | MHPs         |
| Polystyrene                              | PS           |
| Relative humidity                        | RH           |
| Transmission electron microscopy         | TEM          |
| Energy-dispersive X-ray spectroscopy     | EDS          |
| X-ray diffraction                        | XRD          |
| Fourier transform infrared               | FTIR         |
| Ultraviolet-visible                      | UV-vis       |
| X-ray photoelectron spectroscopy         | XPS          |
| Time-resolved photoluminescence          | TRPL         |
| Polydimethylsiloxane                     | PDMS         |
| Commission Internationale del'Eclairage  | CIE          |
| National Television Standards Committee  | NTSC         |

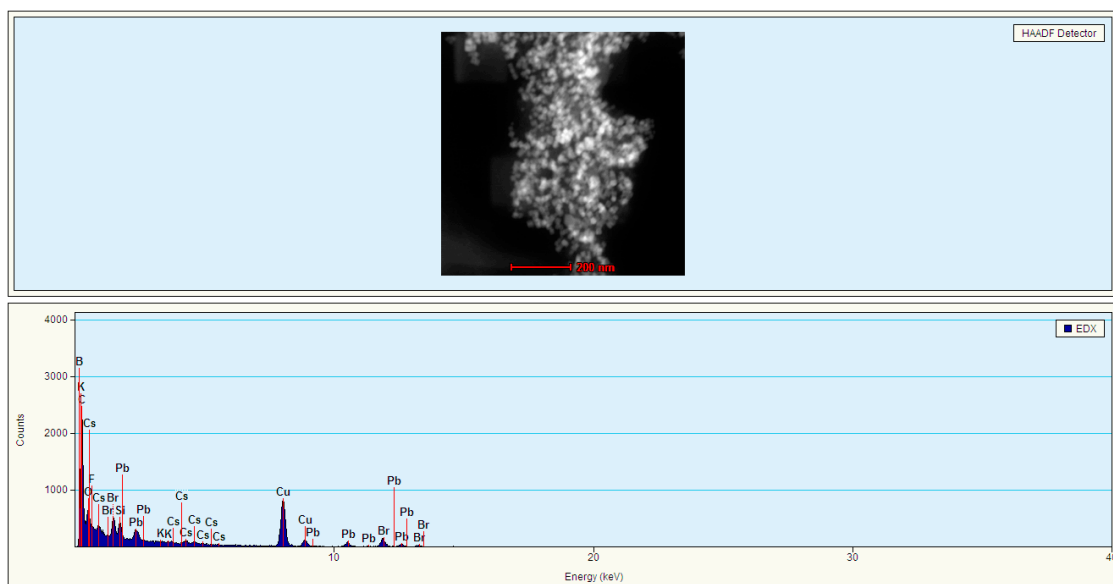

**Figure S1.** EDS energy spectrum of the CsPbBr<sub>3</sub>:KBF<sub>4</sub>@SiO<sub>2</sub>.
